# Supplementary material for: Knowledge, Attitude, and Practices of Antibiotics and Antibiotic Resistance Among Chinese Pharmacy Customers: A Multicenter Survey Study
Source: MDPI journal article supplement (doi:10.3390/antibiotics9040184), 2020-04-16
Supplement: s1 [file s1]

**Supplementary File: Knowledge, attitude and practices of pharmacy customers  
about antibiotics**

**Section A: Personal Information**

|                                                     |                                                                                                                                                                                                                            |
|-----------------------------------------------------|----------------------------------------------------------------------------------------------------------------------------------------------------------------------------------------------------------------------------|
| Gender                                              | <input type="checkbox"/> Male <input type="checkbox"/> Female                                                                                                                                                              |
| Age Group                                           | <input type="checkbox"/> 18-25 <input type="checkbox"/> 26-35 <input type="checkbox"/> 36-45 <input type="checkbox"/> 46-59 <input type="checkbox"/> >60                                                                   |
| Educational Degree                                  | <input type="checkbox"/> No formal education <input type="checkbox"/> Primary school <input type="checkbox"/> Junior high school<br><input type="checkbox"/> Senior high school <input type="checkbox"/> College and above |
| Monthly income                                      | <input type="checkbox"/> <1000 <input type="checkbox"/> 1000-3000 <input type="checkbox"/> 3000-5000 <input type="checkbox"/> 5000-8000 <input type="checkbox"/> >8000                                                     |
| Employment                                          | <input type="checkbox"/> Employed <input type="checkbox"/> Self-employed <input type="checkbox"/> Unemployed <input type="checkbox"/> Student <input type="checkbox"/> Others                                              |
| Do you have prescription in this purchasing?        | <input type="checkbox"/> Yes <input type="checkbox"/> No                                                                                                                                                                   |
| Do you have antibiotics in this purchasing?         | <input type="checkbox"/> Yes <input type="checkbox"/> No                                                                                                                                                                   |
| Who do you have antibiotics for in this purchasing? | <input type="checkbox"/> Children or teenagers <input type="checkbox"/> For yourself <input type="checkbox"/> For others                                                                                                   |

**Section B: Knowledge**

| Question                                                                                            | Yes                      | No                       | Not clear                |
|-----------------------------------------------------------------------------------------------------|--------------------------|--------------------------|--------------------------|
| 1. Antibiotics and anti-inflammatory medicines are the same.                                        | <input type="checkbox"/> | <input type="checkbox"/> | <input type="checkbox"/> |
| 2. Antibiotic can be used to treat bacterial diseases i.e. pneumonia, typhoid and wound infections. | <input type="checkbox"/> | <input type="checkbox"/> | <input type="checkbox"/> |
| 3. Antibiotic can be used to treat common cold.                                                     | <input type="checkbox"/> | <input type="checkbox"/> | <input type="checkbox"/> |
| 4. The antibiotics will not kill normal flora.                                                      | <input type="checkbox"/> | <input type="checkbox"/> | <input type="checkbox"/> |
| 5. Unnecessary use of antibiotics is dangerous for health.                                          | <input type="checkbox"/> | <input type="checkbox"/> | <input type="checkbox"/> |
| 6. Use of antibiotics in pregnant women is safe.                                                    | <input type="checkbox"/> | <input type="checkbox"/> | <input type="checkbox"/> |

---

7. Antibiotics can be used along with tradition Chinese medicines

---

### Section C: Attitude

| Question                                                                                                         | 1-strongly agree; 5-not strongly disagree |                          |                          |                          |                          |
|------------------------------------------------------------------------------------------------------------------|-------------------------------------------|--------------------------|--------------------------|--------------------------|--------------------------|
|                                                                                                                  | SA                                        | A                        | N                        | D                        | SD                       |
| 1. Do you think costly antibiotics are more effective.                                                           | <input type="checkbox"/>                  | <input type="checkbox"/> | <input type="checkbox"/> | <input type="checkbox"/> | <input type="checkbox"/> |
| 2. Do you think costly antibiotics have fewer side effects.                                                      | <input type="checkbox"/>                  | <input type="checkbox"/> | <input type="checkbox"/> | <input type="checkbox"/> | <input type="checkbox"/> |
| 3. Do you think using antibiotic without a doctor's prescription is safe?                                        | <input type="checkbox"/>                  | <input type="checkbox"/> | <input type="checkbox"/> | <input type="checkbox"/> | <input type="checkbox"/> |
| 4. Do you think using double dose of antibiotics can speed up the cure of a diseases.                            | <input type="checkbox"/>                  | <input type="checkbox"/> | <input type="checkbox"/> | <input type="checkbox"/> | <input type="checkbox"/> |
| 5. Do you think using many antibiotics produce the better result than one antibiotic.                            | <input type="checkbox"/>                  | <input type="checkbox"/> | <input type="checkbox"/> | <input type="checkbox"/> | <input type="checkbox"/> |
| 6. Do you agree the effectiveness of treatment would be reduced if a full course of antibiotic was not completed | <input type="checkbox"/>                  | <input type="checkbox"/> | <input type="checkbox"/> | <input type="checkbox"/> | <input type="checkbox"/> |
| 7. Do you think it better to stop taking antibiotic when symptoms are improved.                                  | <input type="checkbox"/>                  | <input type="checkbox"/> | <input type="checkbox"/> | <input type="checkbox"/> | <input type="checkbox"/> |
| 8. Do you think the leftover antibiotics can be saved and used for the same symptoms again.?                     | <input type="checkbox"/>                  | <input type="checkbox"/> | <input type="checkbox"/> | <input type="checkbox"/> | <input type="checkbox"/> |

### Section D: Practices

| Question                                                                                            | always                   | often                    | sometimes                | seldom                   | never                    |
|-----------------------------------------------------------------------------------------------------|--------------------------|--------------------------|--------------------------|--------------------------|--------------------------|
| 1. How often do you read the instruction in the package insert carefully before taking antibiotics? | <input type="checkbox"/> | <input type="checkbox"/> | <input type="checkbox"/> | <input type="checkbox"/> | <input type="checkbox"/> |
| 2. How often do you finish the full course of antibiotic treatment?                                 | <input type="checkbox"/> | <input type="checkbox"/> | <input type="checkbox"/> | <input type="checkbox"/> | <input type="checkbox"/> |
| 3. Do you change the dose during the course of antibiotic treatment?                                | <input type="checkbox"/> | <input type="checkbox"/> | <input type="checkbox"/> | <input type="checkbox"/> | <input type="checkbox"/> |

---

---

4. How often do you switch antibiotics during the course of treatment?

---

5. How often do you keep leftover antibiotics at home in case of future need?

---

**Thank you very much for your time**
